# Supplementary material for: New multifunctional phenanthroimidazole–phosphine oxide hybrids for high-performance red, green and blue electroluminescent devices
Source: Royal Society of Chemistry journal article supplement (doi:10.1039/c4tc00749b), 2014-01-01
Supplement: c4tc00749b1.pdf [file c4tc00749b1.pdf]

## Supporting Information

### New Multifunctional Phenanthroimidazole-Phosphine Oxide Hybrids for High-Performance Red, Green and Blue Electroluminescent Devices

*Kai Wang, Shipan Wang, Shanyong Chen, Jinbei Wei, Dong Liu, Yu Liu\* and Yue Wang\**

State Key Laboratory of Supramolecular Structure and Materials, College of Chemistry, Jilin University, Changchun 130012, P. R. China

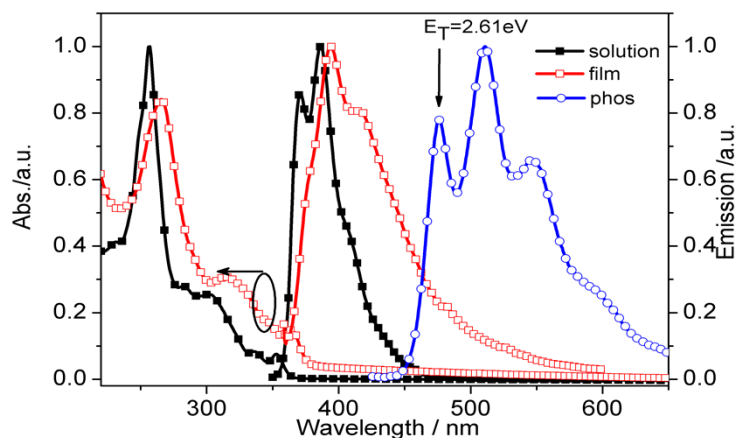

**Figure S1.** Room-temperature UV-vis absorption spectra, PL of spectra of PPI in  $\text{CH}_2\text{Cl}_2$  solution ( $10^{-5}$  M) and neat films, as well as their phosphorescence spectra in 2-MeTHF solution ( $10^{-5}$  M) at 77K.

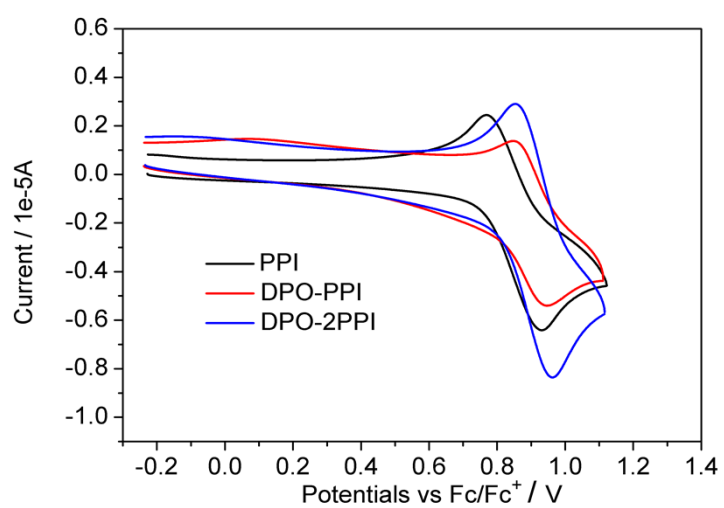

**Figure S2.** Cyclic voltammograms of PPI, DPO-PPI and DPO-2PPI in CH<sub>2</sub>Cl<sub>2</sub> (5×10<sup>-4</sup> M) for oxidation.
